# Supplementary material for: Role of liposome and peptide in the synergistic enhancement of transfection with a lipopolyplex vector
Source: PubMed Central journal article supplement (PMC4365389; doi:10.1038/srep09292), 2015-03-19
Supplement: srep09292-s1.pdf [file srep09292-s1.pdf]

**Role of liposome and peptide in the synergistic enhancement of transfection with a lipopolyplex vector**

**Munye MM<sup>1</sup> \*; Ravi J<sup>2</sup>; Tagalakis AD<sup>1</sup>; McCarthy D<sup>3</sup>; Ryadnov MG<sup>2</sup>; Hart SL<sup>1</sup>**

<sup>1</sup> UCL Institute of Child Health, 30 Guilford Street, London, WC1N 1EH, United Kingdom

<sup>2</sup> National Physical Laboratory, Teddington, Middlesex, TW11 0LW, United Kingdom

<sup>3</sup> UCL School of Pharmacy, 29-39 Brunswick Square, London, WC1N 1AX, United Kingdom

\*Corresponding author: [m.munye@ucl.ac.uk](mailto:m.munye@ucl.ac.uk)

UCL Institute of Child Health, 30 Guilford Street, London, WC1N 1EH, United Kingdom

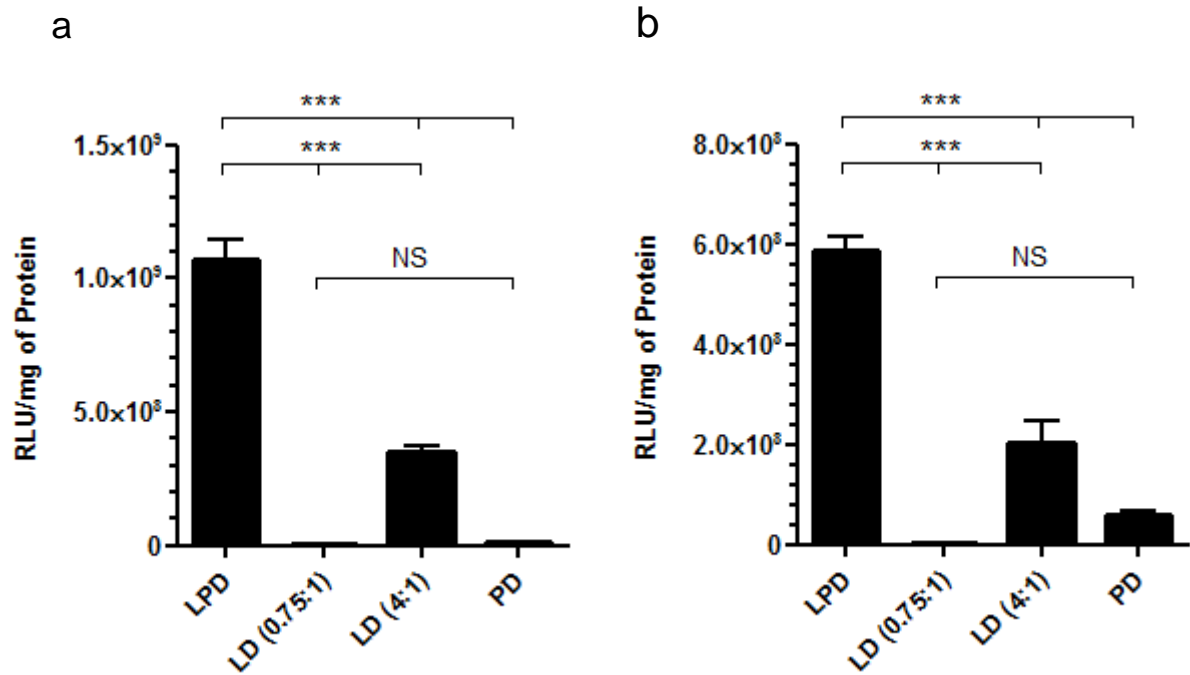

**Figure S1.** Luciferase activity, measured in relative light units (RLU) per mg of protein following transfection of (a) HEK-293T and (b) HT-1080 cells with pCI-Luc complexed into LPD, LD (0.75:1), LD (4:1) and PD nanocomplexes.

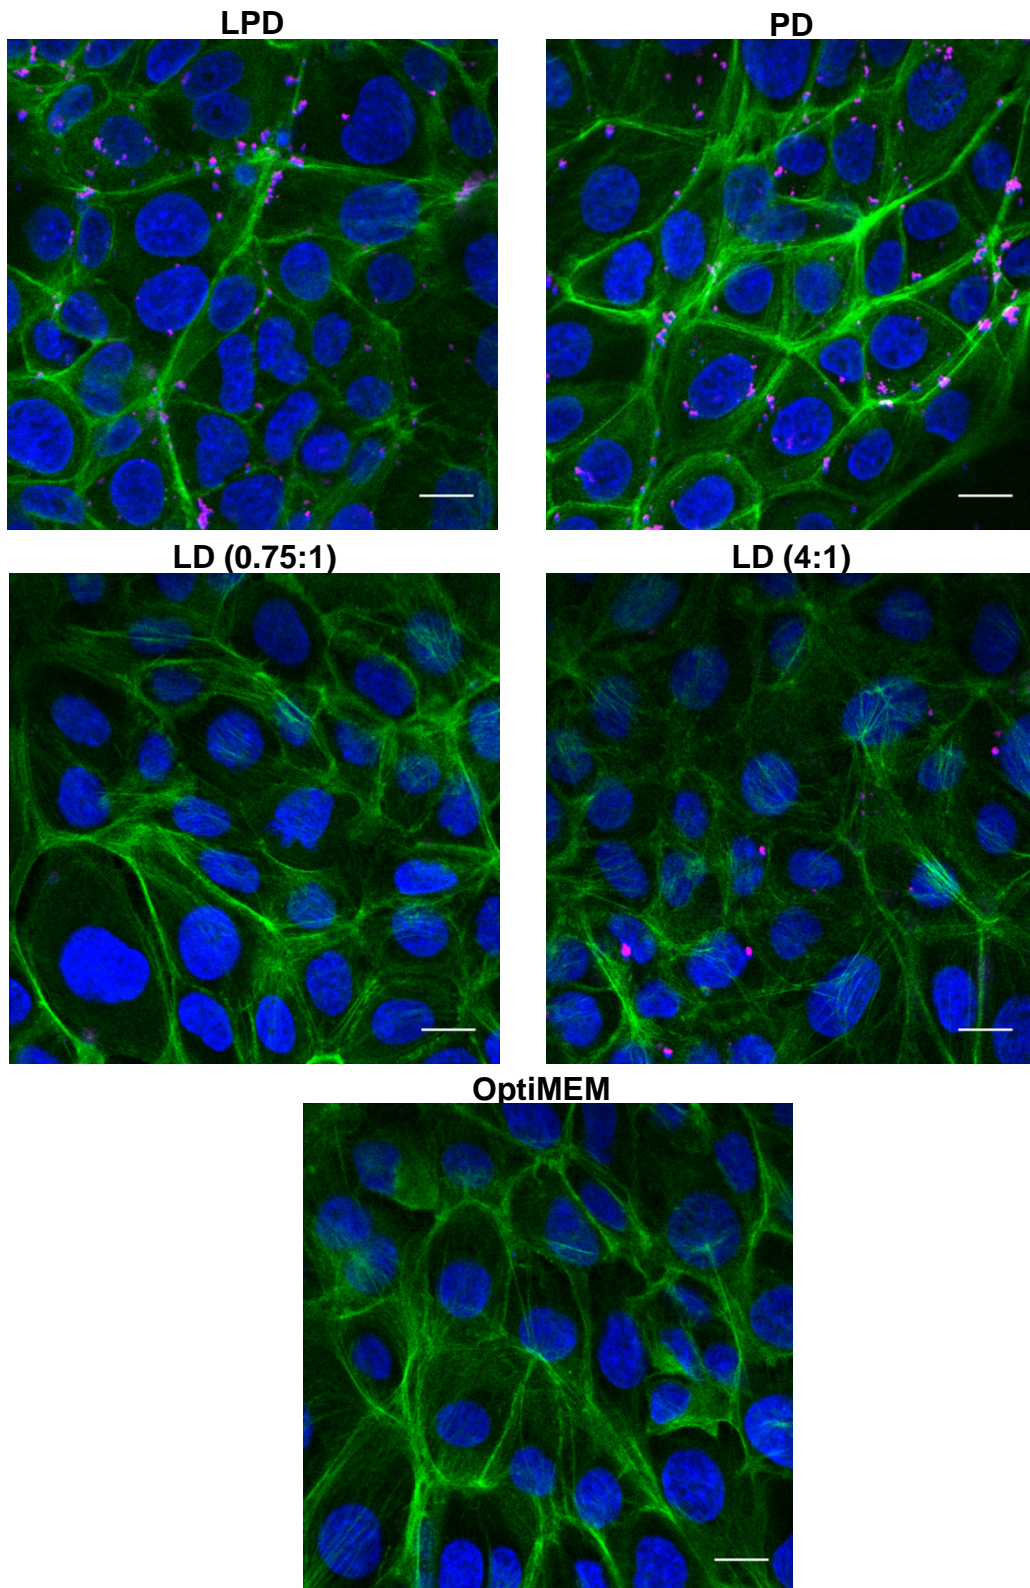

**Figure S2.** Laser scanning confocal microscopy images of 16HBE14o cells transfected with Cy5 labelled pCI-Luc (magenta) complexed into LPD, PD, LD (0.75:1) and LD (4:1) nanocomplexes. Control cells were left untransfected in OptiMEM. Nucleus of the cells was stained with DAPI (blue) and F-actin (green) staining was used to show cell boundaries. Scale bars are 15 $\mu$ m.

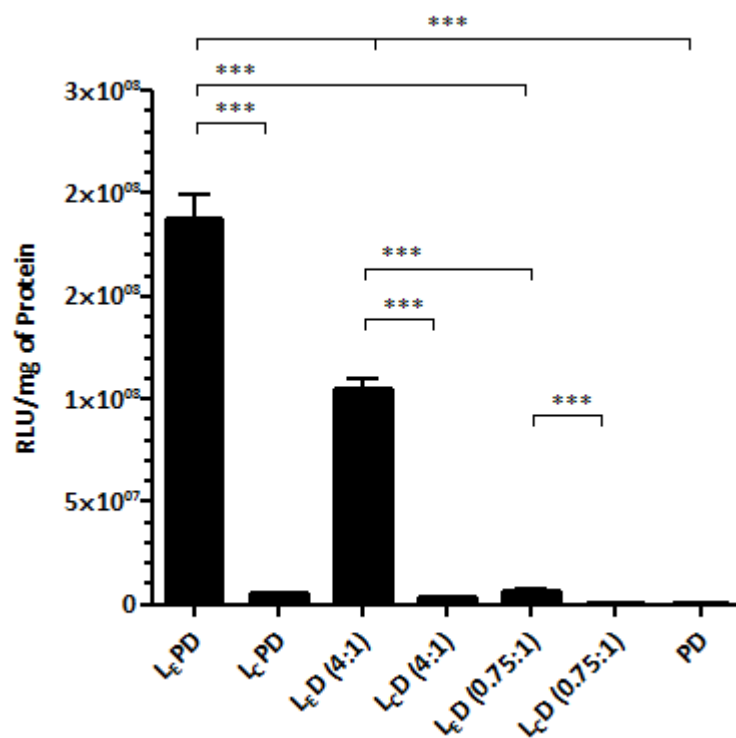

**Figure S3.** Luciferase activity, measured in relative light units (RLU) per mg of protein following transfection of 16HBE14o<sup>-</sup> cells with pCI-Luc complexed into LPD, LD (0.75:1), LD (4:1) and PD nanocomplexes formulated with DHDTMA:DOPE (L<sub>E</sub>) or DHDTMA:DOPC (L<sub>C</sub>) liposomes.

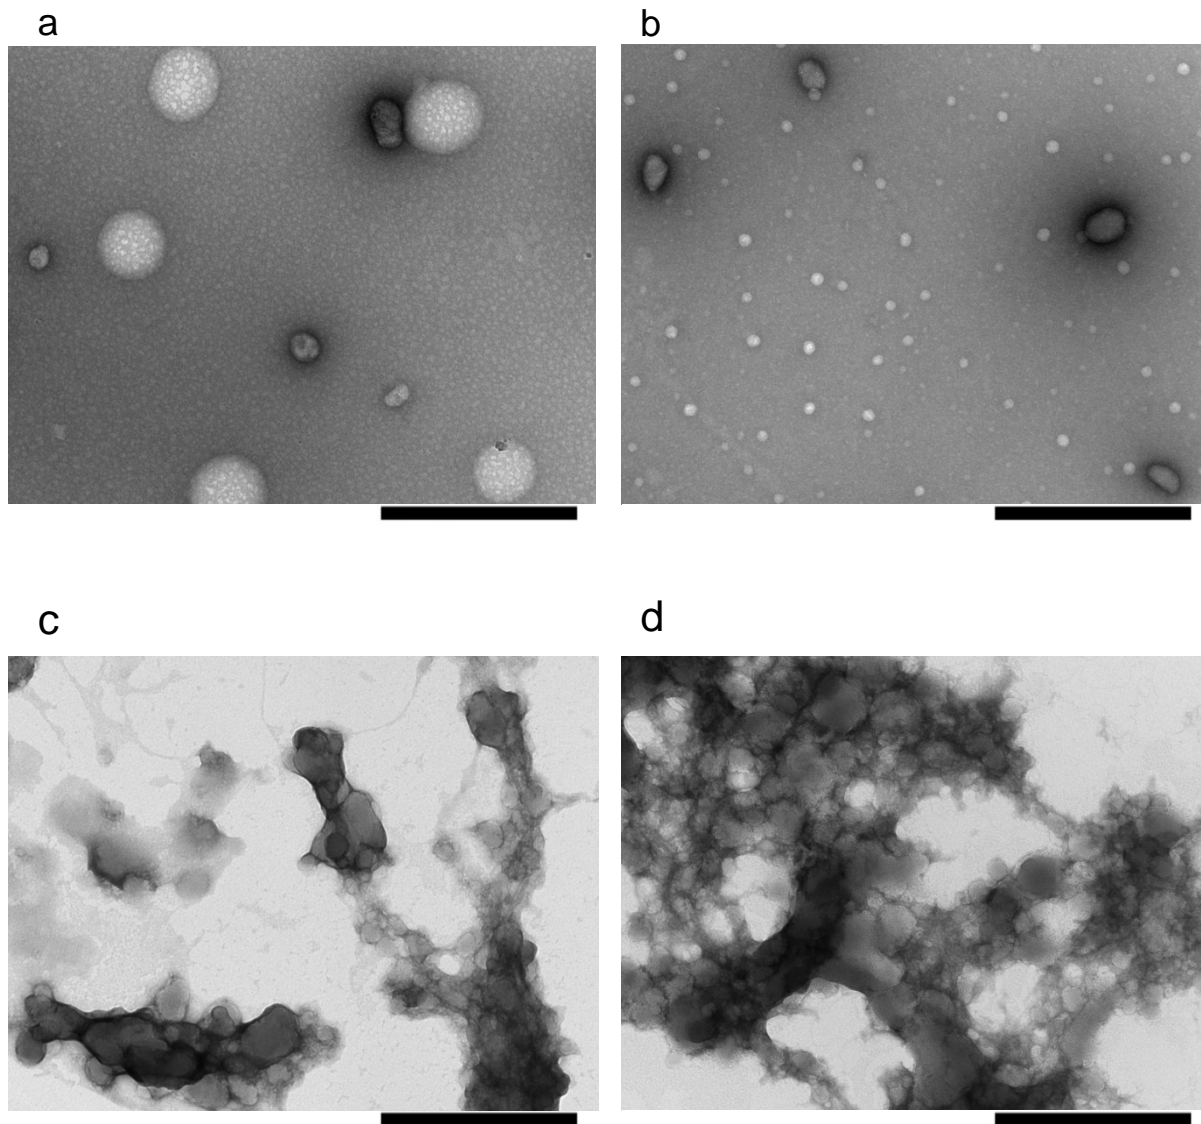

**Figure S4.** Transmission electron micrographs of (a) LPD and (b) PD (c) LD (0.75:1) and (d) LD (4:1) complexes. Scale bars are 500nm.
